# Supplementary material for: Nup98-dependent transcriptional memory is established independently of transcription
Source: eLife. 2022 Mar 15;11:e63404. doi: 10.7554/eLife.63404 (PMC8923668; doi:10.7554/eLife.63404)
Supplement: Supplementary file 1. [file elife-63404-supp1.xlsx]

## Sheet: Sheet1
Primers	Sequence	Aplication
F-dsWhite	TTAATACGACTCACTATAGGGAGAGATCCTGGCTGTCGGTGCTCA	dsRNA
R-dsWhite	TTAATACGACTCACTATAGGGAGAGATCATCGGATAGGCAATCGC	dsRNA
F-dsNup98	TTAATACGACTCACTATAGGGAGACCCATTCATCAGCAGATCCT	dsRNA
R-dsNup98	TTAATACGACTCACTATAGGGAGATATCCTGACTTTCCCGTCCA	dsRNA
F-Rp49 (exon-exon junction)	GCTGTCGCACAAATGGCGCA	RT-qPCR
R-Rp49 (exon-exon junction)	TCGCCGCAGTAAACGCGGTT	RT-qPCR
F-Rp49 (exon-intron)	AACATGTCTCCTTGCAGCAC	RT-qPCR (nascent)
R-Rp49 (exon-intron)	TGTTGGGCATCAGATACTGTCC	RT-qPCR (nascent)
F-E74	CGCCCCCATAAAGAAAAGTGC	RT-qPCR
R-E74	CTGTGCGGCCTCATCTCAAG	RT-qPCR
F-E23	ACCATCAAGCCGCACTACAA	RT-qPCR
R-E23	TAGTTGCCGTGCGATTCCTT	RT-qPCR
F-E75	GGCTGCGACGATGAACTTTG	RT-qPCR
R-E75	GCGGAAGAATCCATCGGCAT	RT-qPCR
F-Nup98	AGGCTTATTCGGGGCAAACA	RT-qPCR
R-Nup98	GAGAAGGCTCCAAAAGCCGT	RT-qPCR
Eip74EF-RA_01	AGTTGGGGCAAAATTTGCGA	smFISH
Eip74EF-RA_02	AAAAGCGAAGGTTTTCCTCT	smFISH
Eip74EF-RA_03	GAACGCTGCAGTTACAGTTA	smFISH
Eip74EF-RA_04	GATATTTTGGGATTGCACTT	smFISH
Eip74EF-RA_05	CTCTTTGTAACGCATTTTAT	smFISH
Eip74EF-RA_06	CCACTTGAACAGCGAGATTT	smFISH
Eip74EF-RA_07	GAAAAGCCGACCAAAGGCTG	smFISH
Eip74EF-RA_08	TTCTATCAGTTACTTTGCGA	smFISH
Eip74EF-RA_09	TTGTCAATCAGCCAATGTCG	smFISH
Eip74EF-RA_10	AAATGGCTCCCAATTTCCGA	smFISH
Eip74EF-RA_11	CTTTTGGCACGCATTTATGG	smFISH
Eip74EF-RA_12	TTGCATTAGTTCCCAGTTTG	smFISH
Eip74EF-RA_13	AGTTTTATTGCCATTAGCAT	smFISH
Eip74EF-RA_14	TTATTTTGGTCTTTTGTGGC	smFISH
Eip74EF-RA_15	CTCGGGCGCATTTTATATAG	smFISH
Eip74EF-RA_16	CCACTCGATGTTGTTGTATT	smFISH
Eip74EF-RA_17	CTTCACTTGTTGCACATTGA	smFISH
Eip74EF-RA_18	ATCCTCGACGTTGCTGAATG	smFISH
Eip74EF-RA_19	ATTTTGGCTTGGTTTTGGAG	smFISH
Eip74EF-RA_20	GAGTTTTGACTTCGCATCTG	smFISH
Eip74EF-RA_21	GTTGTTTTAGGCACTTTATT	smFISH
Eip74EF-RA_22	AAATTTCGATCTCCGTTCGC	smFISH
Eip74EF-RA_23	ACGAACTTGCAATACCTCGA	smFISH
Eip74EF-RA_24	TAGTTTCGCTGCGGAAACAC	smFISH
Eip74EF-RA_25	GTATCTAGTGTCCACTAGTT	smFISH
Eip74EF-RA_26	GCGAAAGTTCTGCTCAATCT	smFISH
Eip74EF-RA_27	TGTAGCCGTTTCCTGAATAC	smFISH
Eip74EF-RA_28	CAAACACTGTTAACTGCCAG	smFISH
Eip74EF-RA_29	TGATAGGGCAAAGCCTGCAC	smFISH
Eip74EF-RA_30	TTATCTGGACACCAGAGCAG	smFISH
Eip74EF-RA_31	ACCTCCAACAAGACGACCAT	smFISH
Eip74EF-RA_32	CAAGTTTTCCGTTCCGTTAG	smFISH
Eip74EF-RA_33	CGAAGTTGCTCTCGGAGAAG	smFISH
Eip74EF-RA_34	ATTCTCTTTGGCTAGCAGAT	smFISH
Eip74EF-RA_35	CGAGCTGGAAGAGCCGAAGG	smFISH
Eip74EF-RA_36	CTCGACGAGAAGGGGATTGG	smFISH
Eip74EF-RA_37	TCAGGCACTTGGACATTAGC	smFISH
Eip74EF-RA_38	GGAAATGAACCTGTTGTGGC	smFISH
Eip74EF-RA_39	ATTCGGATGCAGAAAGGTGC	smFISH
Eip74EF-RA_40	ACACTGCGATTCCATATGTT	smFISH
Eip74EF-RA_41	CACTGCTTCCGTAGTAGTTG	smFISH
Eip74EF-RA_42	TGCGTTGAAGTAGGACGTTG	smFISH
Eip74EF-RA_43	CACAGATAGGTGGTGGATCC	smFISH
Eip74EF-RA_44	GAGCAGTTTGAGGAGGAACT	smFISH
Eip74EF-RA_45	GGTTCGTCCACTTGATGAAA	smFISH
Eip74EF-RA_46	ATCGTCTCGTAGTTCATGTC	smFISH
Eip74EF-RA_47	CTGGTAGTAGTACCTCAGCG	smFISH
Eip74EF-RA_48	ACATCCACGAACTGGTAGAC	smFISH
Eip74EF-RA_49	CATCACTTCACACACCGTTG	smFISH
Eip74EF-RA_50	TATTTACAGGCCTCGTCGTC	smFISH
Eip74EF-RA_51	TCTGCGATCTGGGATCGAAC	smFISH
Eip74EF-RA_52	GCTAGCCGGTTGATTTATAC	smFISH
Eip74EF-RA_53	CGCTGGCTAACCAAGAAACT	smFISH
Eip74EF-RA_54	CACTAACGCCCATGAATAGA	smFISH
Eip74EF-RA_55	ATGAATCAATTCGGTCGTCC	smFISH
Eip74EF-RA_56	GGGGACAGTTGAAAGGTCAT	smFISH
Eip74EF-RA_57	CTGCATCTGCACTGAGCTTG	smFISH
Eip74EF-RA_58	ATCGTTCAGATCTCCGTATA	smFISH
Eip74EF-RA_59	TTAGCTCCAGTTAGGATGTG	smFISH
Eip74EF-RA_60	AAGTTTAGACCACCAGTTTG	smFISH
Eip74EF-RA_61	CTTCGGGTTTATCCTGTGAG	smFISH
Eip74EF-RA_62	AACGAGGGCTCAAGAAGTGC	smFISH
Eip74EF-RA_63	GTTTGGTGTTCTAAGACTGC	smFISH
Eip74EF-RA_64	TCAGATCGAGAGACTTGAGT	smFISH
Eip74EF-RA_65	AAATGTCCAGATCTGTTCCA	smFISH
Eip74EF-RA_66	CTCTTTCCTATTCAAGGTAT	smFISH
Eip74EF-RA_67	AGAACTAGGAGTTGGTTTTA	smFISH
Rpt6	See Aleman et al (2021), doi: 10.1016/j.celrep.2021.109236	smFISH
Pp4-19C	See Aleman et al (2021), doi: 10.1016/j.celrep.2021.109236	smFISH
